# Supplementary material for: Ddb1 Is Essential for the Expansion of CD4+ Helper T Cells by Regulating Cell Cycle Progression and Cell Death
Source: PubMed Central journal article supplement (PMC8435776; doi:10.3389/fimmu.2021.722273), 2021-08-30

Fig. S1

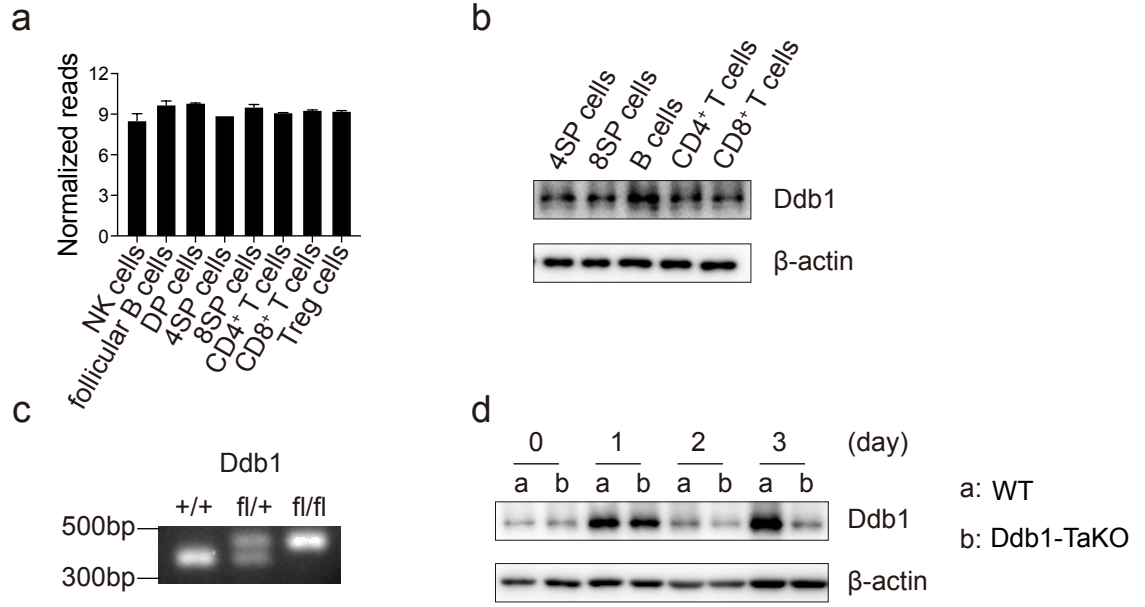

Fig. S2

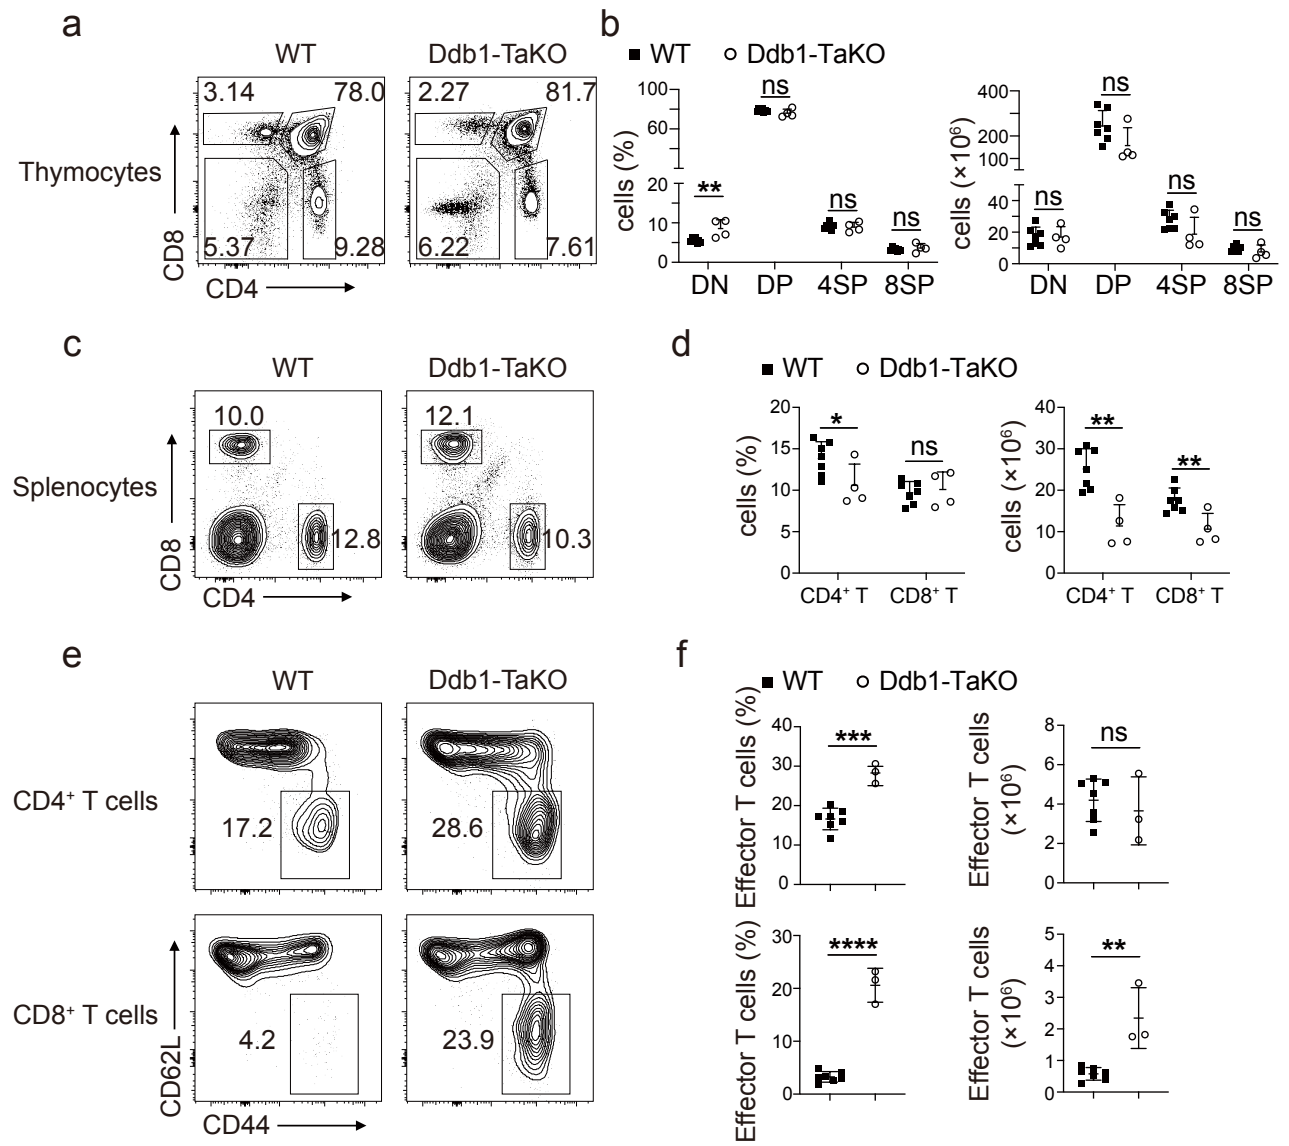

Fig. S3

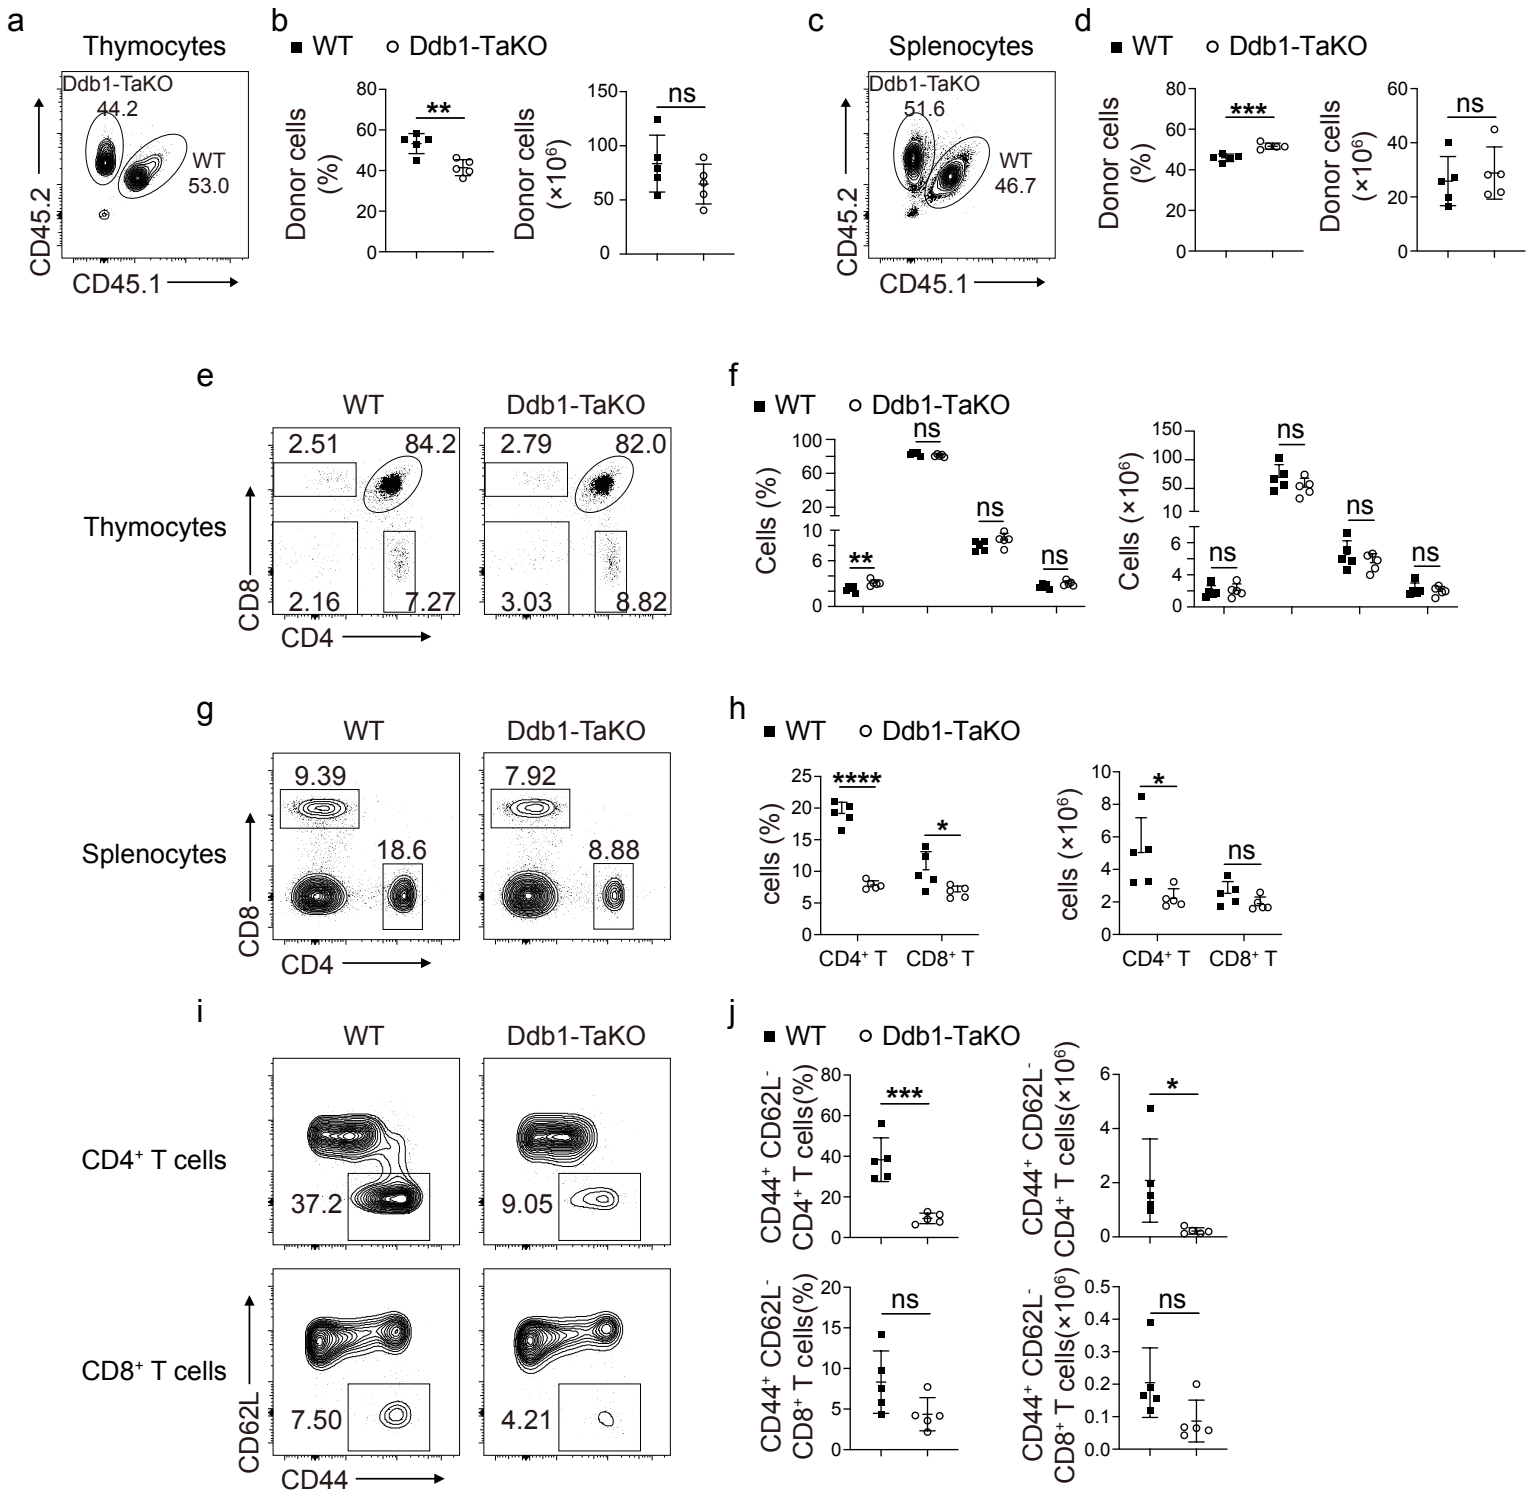

Fig. S4

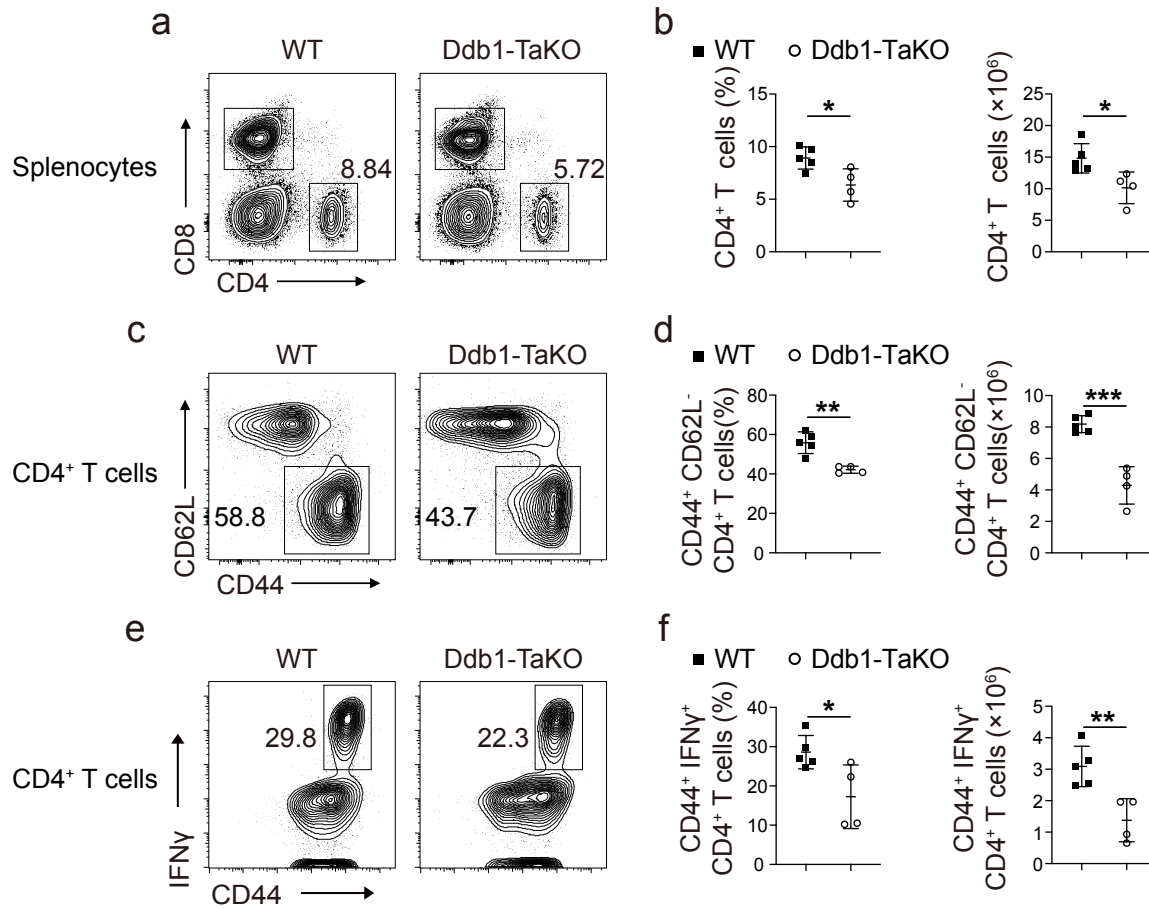

Fig. S5

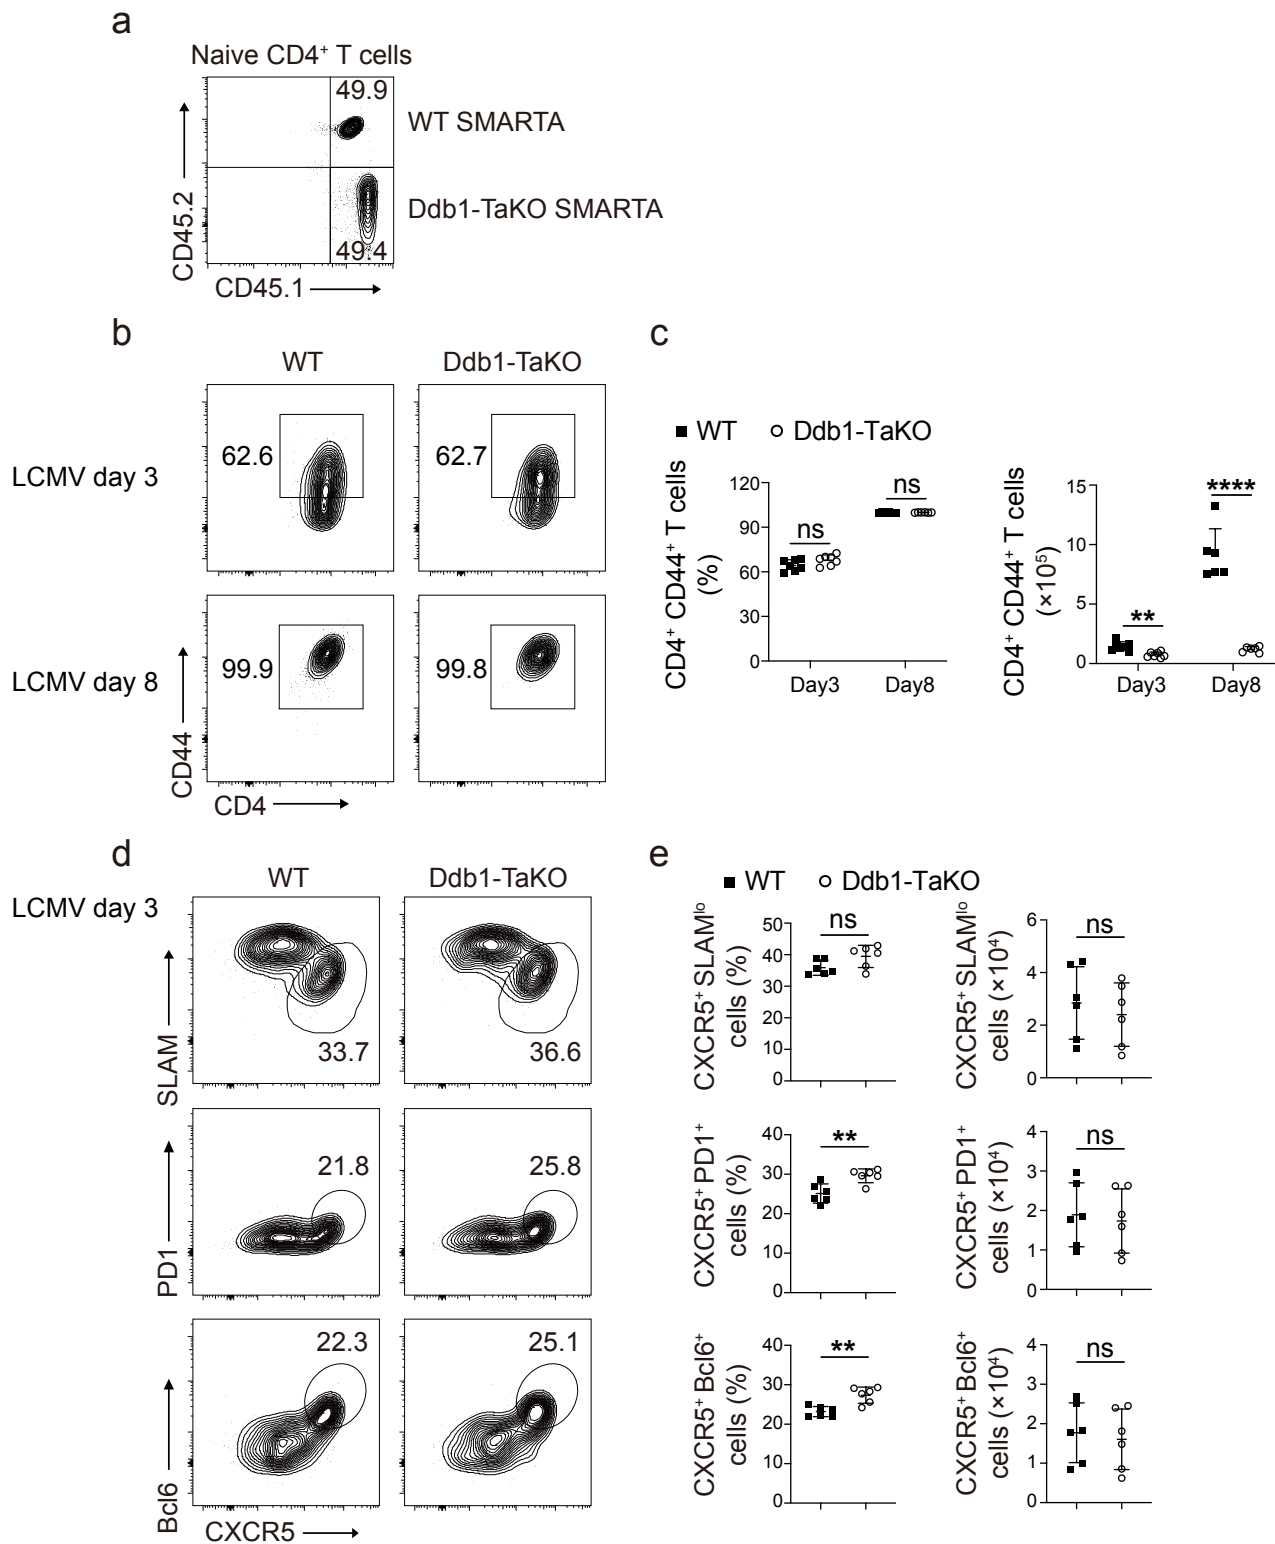

Fig. S6

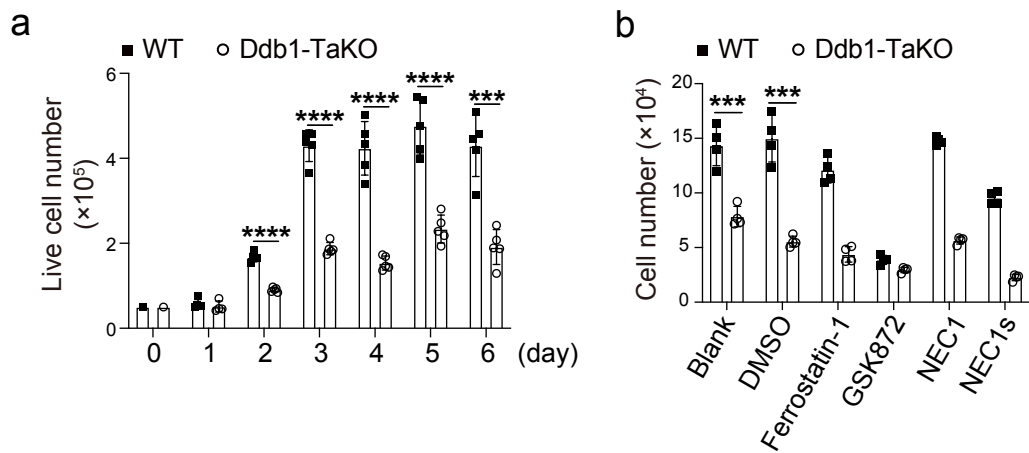

Fig. S7

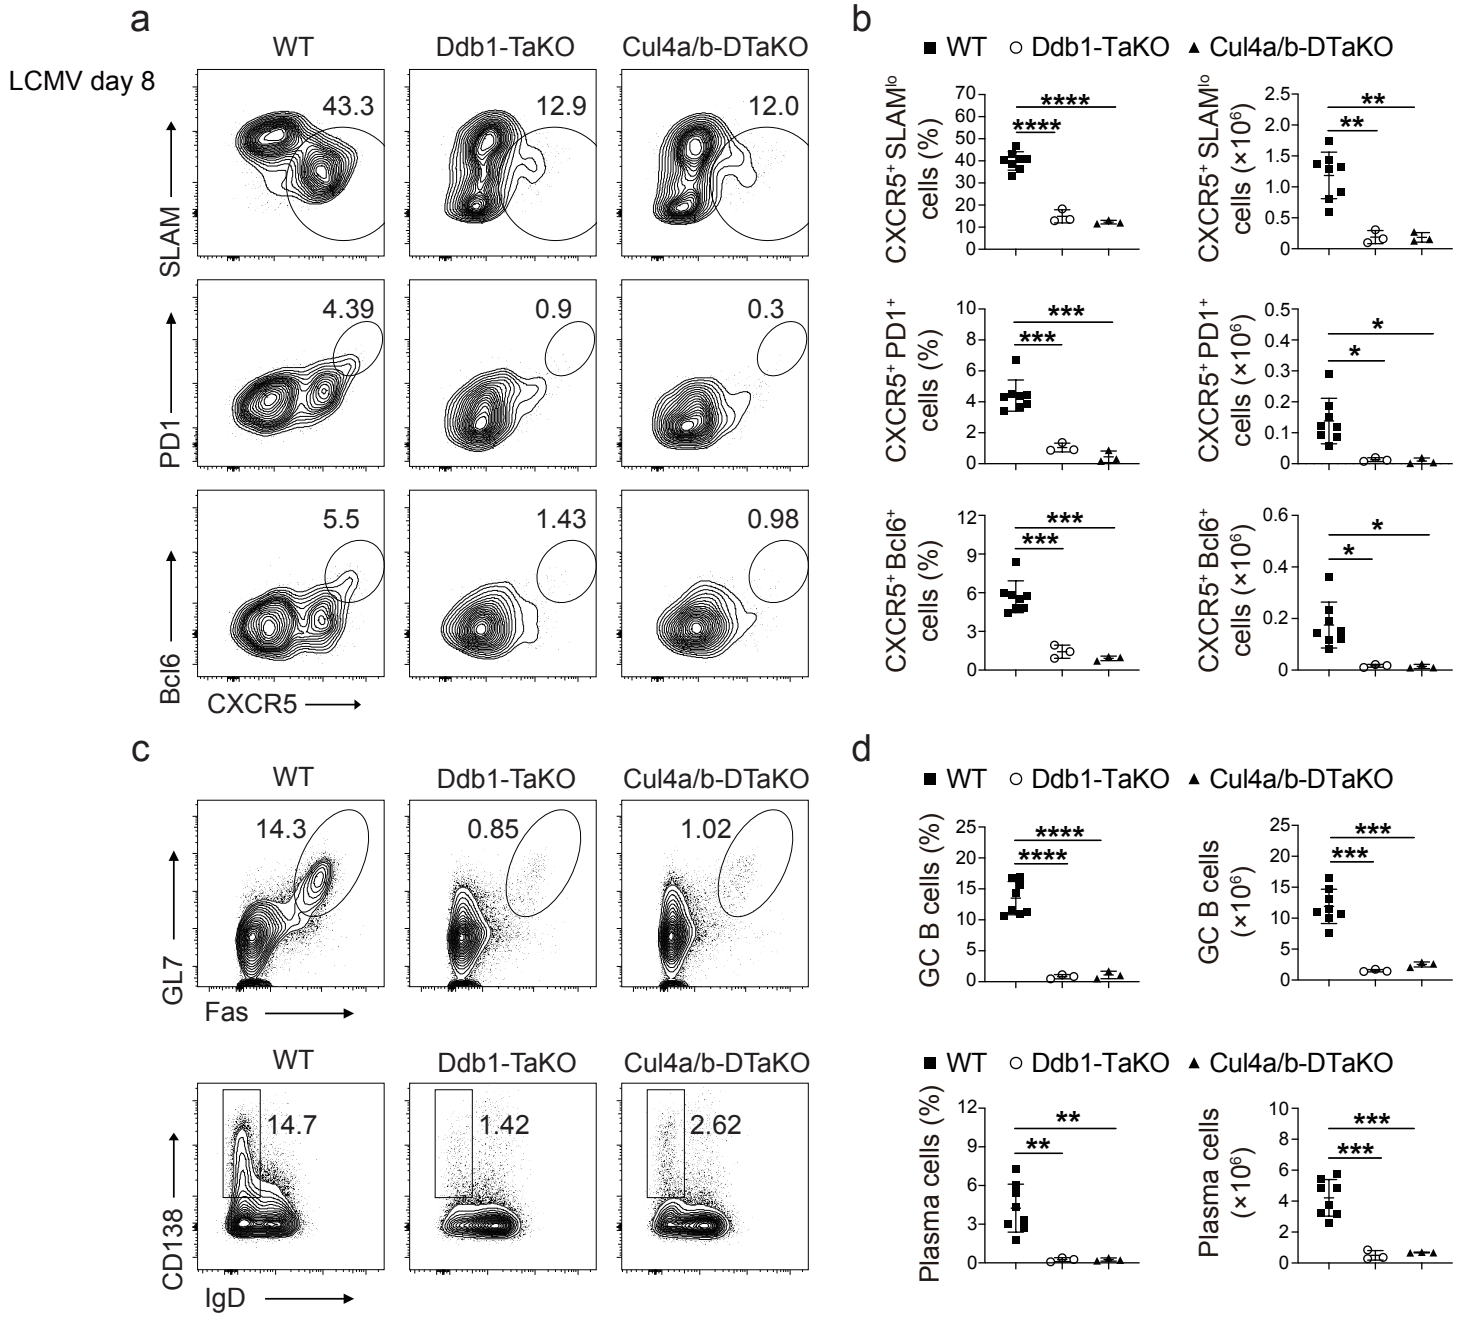

Fig. S8

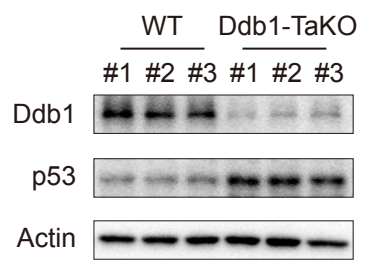



Fig. S9

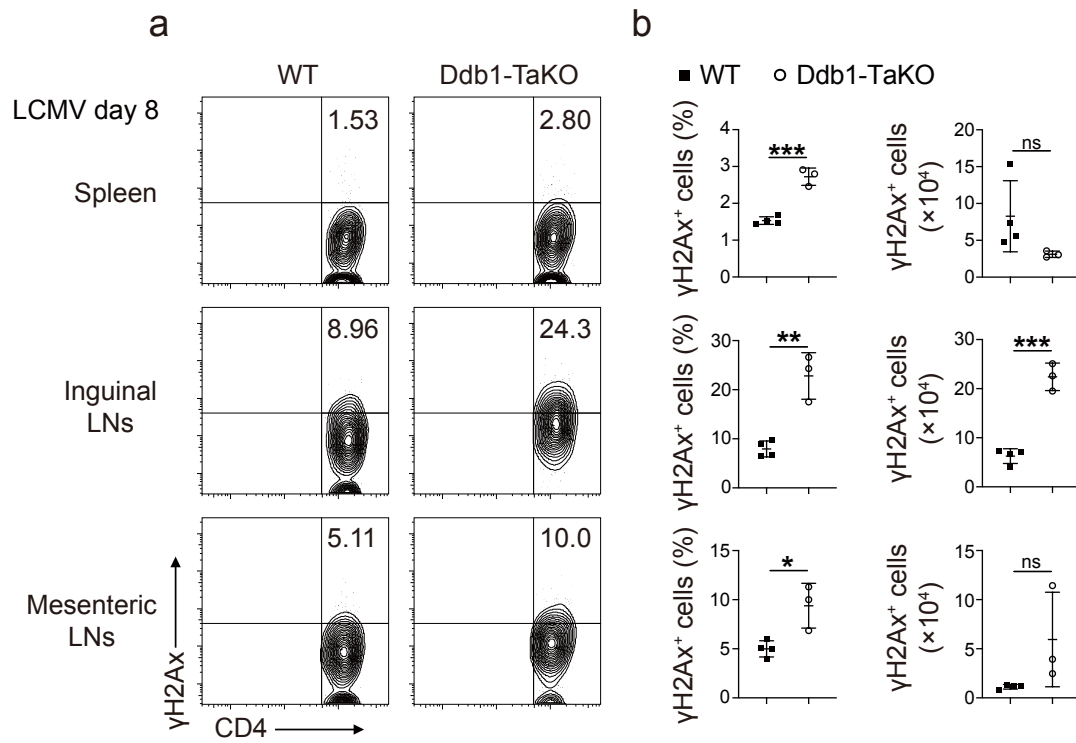

Supplement: DataSheet_1.pdf [file DataSheet_1.pdf]
